# Supplementary material for: Efficacy of a bivalent killed whole-cell cholera vaccine over five years: a re-analysis of a cluster-randomized trial
Source: Springer Nature journal article supplement (doi:10.1186/s12879-018-2981-4), 2018-02-20
Supplement: MOESM3 [file 15478052]

## Supplementary Text: Model Equations

B/B:  $\text{Surv}(X,d) \sim \text{trt\_young} + \text{trt\_middle} + \text{trt\_old} + \text{middleagegrp} + \text{oldagegrp}$   
+  $\text{hh\_ward} + \text{large\_cluster} + \text{hh\_ownhouse} + \text{hh\_stableoccupation} + \text{hh\_hiexpenditure}$   
+  $\text{hh\_farfromwater} + \text{cluster}(\text{cl\_id})$

T/T:  $\text{Surv}(t\text{start},t\text{stop},d) \sim \text{trt\_young} + \text{trt\_middle} + \text{trt\_old} + \text{middleagegrp} + \text{oldagegrp}$   
+  $\text{hh\_ward} + \text{large\_cluster} + \text{hh\_ownhouse} + \text{hh\_stableoccupation} + \text{hh\_hiexpenditure}$   
+  $\text{hh\_farfromwater} + \text{cluster}(\text{cl\_id})$

B/T:  $\text{Surv}(t\text{start},t\text{stop},d) \sim \text{trt\_byoung} + \text{trt\_bmiddle} + \text{trt\_bold} + \text{middleagegrp} + \text{oldagegrp}$   
+  $\text{hh\_ward} + \text{large\_cluster} + \text{hh\_ownhouse} + \text{hh\_stableoccupation} + \text{hh\_hiexpenditure}$   
+  $\text{hh\_farfromwater} + \text{cluster}(\text{cl\_id})$

T/B:  $\text{Surv}(t\text{start},t\text{stop},d) \sim \text{trt\_young} + \text{trt\_middle} + \text{trt\_old} + \text{bmiddleagegrp} + \text{boldagegrp}$   
+  $\text{hh\_ward} + \text{large\_cluster} + \text{hh\_ownhouse} + \text{hh\_stableoccupation} + \text{hh\_hiexpenditure}$   
+  $\text{hh\_farfromwater} + \text{cluster}(\text{cl\_id})$

The formula B/B is used together with the un-augmented dataset, and all the age group-related predictors in the formula are calculated at baseline. The other three formulae are used together with the augmented dataset for time-dependent covariate analysis [1], in which the variables `trt_young`, `trt_middle`, `trt_old`, `middleagegrp` and `oldagegrp` are calculated using age group during the time interval defined by `tstart` and `tstop`, while the variables `trt_byoung`, `trt_bmiddle`, `trt_bold`, `bmiddleagegrp` and `boldagegrp` are calculated using baseline age group.

### Reference

[1] Therneau T, Crowson C. Using time dependent covariates and time dependent coefficients in the Cox model. R Survival Package Vignette. 2014.
